# Supplementary material for: Comparative Transcriptome Profiling of Two Tomato Genotypes in Response to Potassium-Deficiency Stress
Source: MDPI journal article supplement (doi:10.3390/ijms19082402), 2018-08-14

**Figure S2:** Hierarchical clustering analysis of the oppositely regulated DEGs under K<sup>+</sup>-deficiency stress in the two varieties.

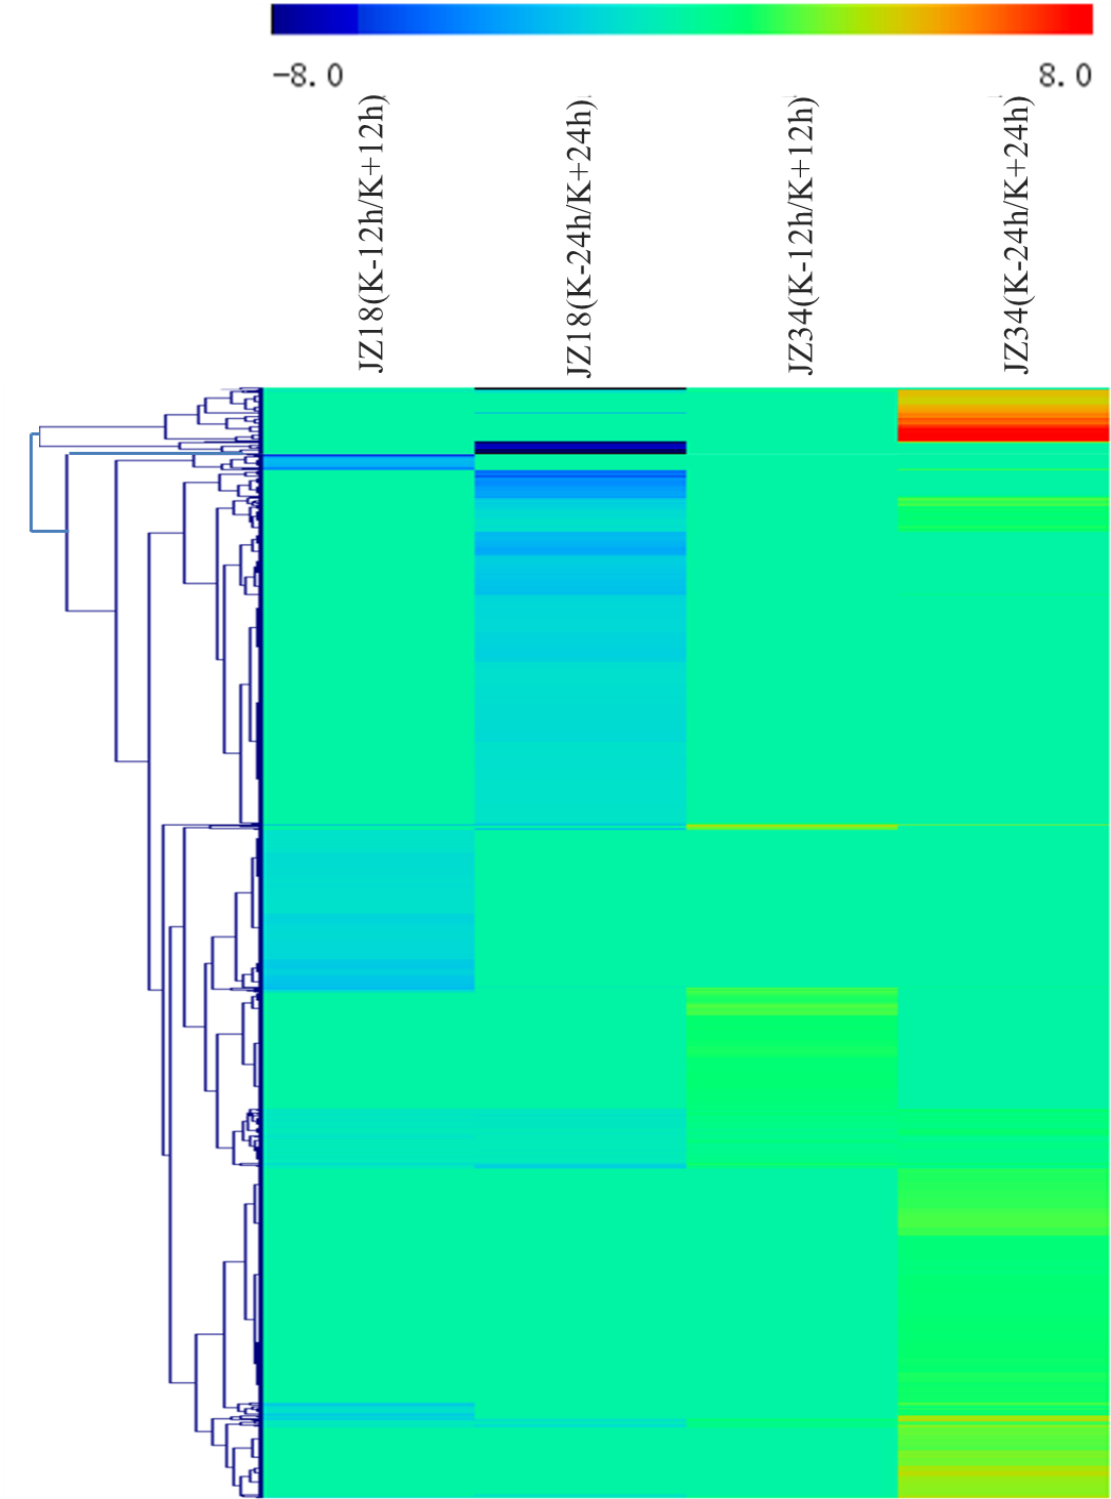

Supplement: s1 [file s1]
