# Supplementary material for: Comparative Transcriptome Profiling of Two Tomato Genotypes in Response to Potassium-Deficiency Stress
Source: MDPI journal article supplement (doi:10.3390/ijms19082402), 2018-08-14
Supplement: s1 [file s1]

**Table S1:** Gene function annotations of 20 DEGs

| Transcript ID      | Description                                 |
|--------------------|---------------------------------------------|
| Solyc01g010480.2.1 | Potassium channel                           |
| Solyc03g097930.2.1 | potassium channel SKOR-like                 |
| Solyc07g014680.2.1 | Potassium voltage-gated channel             |
| Solyc11g011500.1.1 | KUP system potassium uptake protein         |
| Solyc12g009540.1.1 | Potassium transporter                       |
| Solyc03g005520.1.1 | Ethylene responsive transcription factor 1a |
| Solyc03g005500.1.1 | Ethylene-responsive transcription factor 14 |
| Solyc02g094270.1.1 | WRKY transcription factor                   |
| Solyc03g082430.1.1 | Growth-regulating factor 4                  |
| Solyc04g074030.2.1 | LRR receptor-like protein kinase            |
| Solyc12g009780.1.1 | LRR receptor-like protein kinase            |
| Solyc01g006390.2.1 | Cysteine-rich receptor-like protein kinase  |
| Solyc01g068410.1.1 | Auxin Efflux Carrier                        |
| Solyc10g017990.1.1 | Cytokinin dehydrogenase 1                   |
| Solyc07g052370.2.1 | Cytochrome P450                             |
| Solyc06g066230.2.1 | Cytochrome P450                             |
| Solyc07g056430.2.1 | Glutathione S-transferase                   |
| Solyc07g056510.2.1 | Glutathione S-transferase-like protein      |
| Solyc03g097560.2.1 | bidirectional sugar transporter SWEET14     |
| Solyc08g066100.2.1 | ATP-dependent 6-phosphofructokinase         |
