# Supplementary material for: Comparative Transcriptome Profiling of Two Tomato Genotypes in Response to Potassium-Deficiency Stress
Source: MDPI journal article supplement (doi:10.3390/ijms19082402), 2018-08-14
Supplement: s1 [file s1]

**Figure S1:** Comparison of the leaf changes in different tomato varieties under  $K^+$ -deficiency stress conditions at 3 d and 7 d.

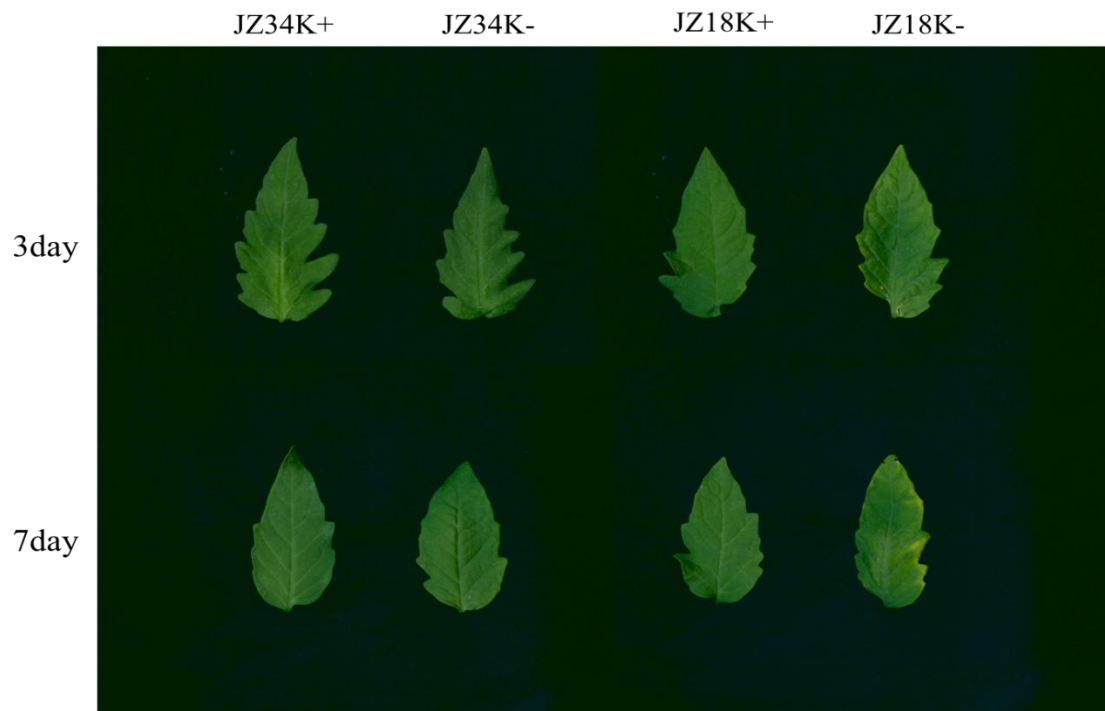

K+ represents normal  $K^+$ ; K- represents  $K^+$  deficiency
