# Supplementary material for: Comparative Transcriptome Profiling of Two Tomato Genotypes in Response to Potassium-Deficiency Stress
Source: MDPI journal article supplement (doi:10.3390/ijms19082402), 2018-08-14
Supplement: s1 [file s1]

**Table S5:** Primers used for qRT-PCR.

|   | Gene Name      | Primers(5'-3')                                    |
|---|----------------|---------------------------------------------------|
| A | Solyc01g010480 | F:AGAAGGACGGGAGAGTGAT<br>R:TGAACCTGATGCCAGAGA     |
| B | Solyc03g097930 | F:CGTCCCCTGCTTCTACTACT<br>R:AGAATCGGTTGAAGCTGCTG  |
| C | Solyc07g014680 | F:CCTACCGTCTTTTCGTCCTC<br>R:GCTTCCCCACCAAGAAACAT  |
| D | Solyc11g011500 | F:TCTGGAGGAGGTTGGTATTG<br>R:GGCAAATGACTGCTTATCG   |
| E | Solyc12g009540 | F:TGGAGAGTTGGAGGAAGAGAT<br>R:TACCACTGCCTTGGAGACTG |
| F | Solyc03g005520 | F:CTATGACCTTCTCGCACAAG<br>R:TCAGCACTATCAAATGTCCC  |
| G | Solyc03g005500 | F:TCGTGTTTGGCTAGGGACAT<br>R:TATGGCCAAATGTCCCCTCA  |
| H | Solyc02g094270 | F:AGGGTTTCTTGGGATTCTG<br>R:TCCTTATTTTCGTGTTTCGGTC |
| I | Solyc03g082430 | F:TTCTTCCTCCACCTCCTTC<br>R:GTAGTCATTCCTCCTTGGA    |
| J | Solyc04g074000 | F:CAACTTCTCTGGCACTATCCC<br>R:GTTTCCCTATTTCTGCTGGA |
| K | Solyc04g074030 | F:CAATGGCGAAGGGACATA<br>R:AGAACCAGCGAAAGCACA      |
| L | Solyc12g009780 | F:TGTCAACATCTCTTCTCCGA<br>R:TCAATGAACTCAAGGTGCC   |
| M | Solyc01g006390 | F:GGTCATGGCAAGAGAAGTCG<br>R:AACTTGTTGGTGAGGGTGA   |
| N | Solyc10g017990 | F:AGGGTTTCTTGGGATTCTG                             |

|   |                |                                                           |
|---|----------------|-----------------------------------------------------------|
|   |                | R:TCCTTATTTTCGTGTTTCGGTC                                  |
| O | Solyc07g052370 | F:GGTCAAGTCATTCAGCCCT<br>R:GCGGCATTCATAAACCATAG           |
| P | Solyc06g066230 | F:TGGAGGTGAAGATTTGGTTG<br>R:TCAGTCCCAGCGGTAAACA           |
| Q | Solyc07g056430 | F:GCACTTGGAGAGAAGCCTT<br>R:CTTTGTATGCTGCGGATG             |
| R | Solyc07g056510 | F:CCTTTGGTATGAGGGTGAGA<br>R:GGATTTGCTTATGGATAGGG          |
| S | Solyc03g097560 | F:GGGTTCCAATCAGTTCCTT<br>R:GTTTCATCGTGTCCATCTTG           |
| T | Solyc08g066100 | F:TGAAGGTGGTGAATGGAGA<br>R:TATGCTGGATTAGACCGCA            |
|   | <i>Actin</i>   | F: TGTCCCTATTTACGAGGGTTATGC<br>R: AGTTAAATCACGACCAGCAAGAT |

---
