# Supplementary material for: Comparative Transcriptome Profiling of Two Tomato Genotypes in Response to Potassium-Deficiency Stress
Source: MDPI journal article supplement (doi:10.3390/ijms19082402), 2018-08-14
Supplement: s1 [file s1]

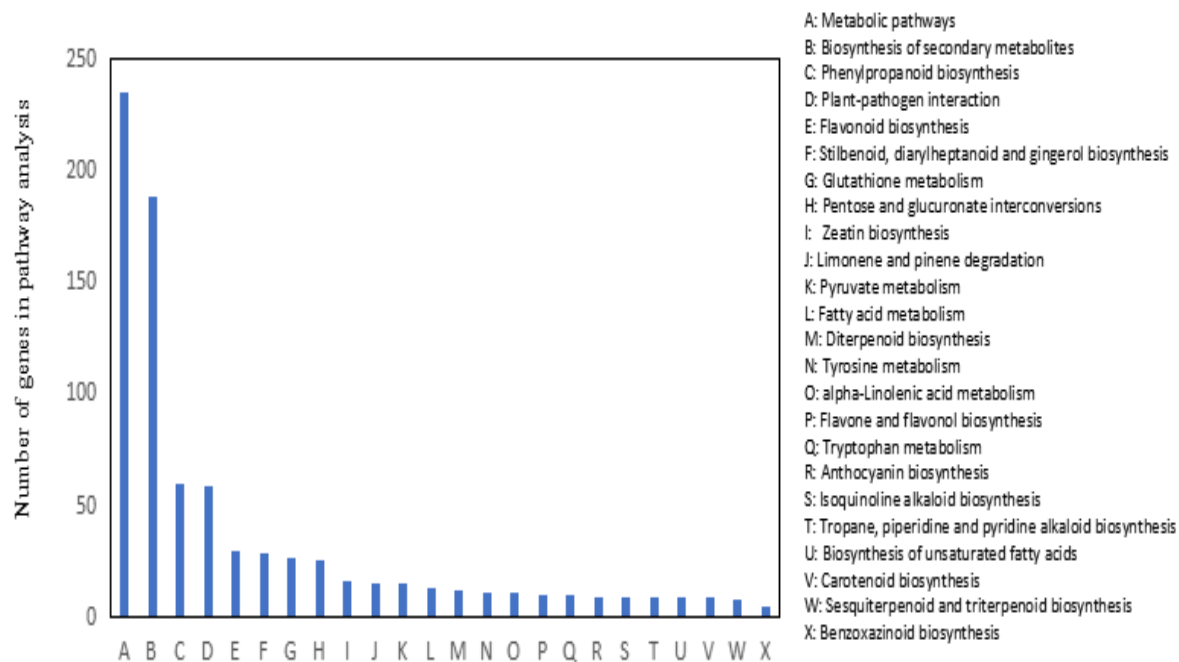

**Figure S3:** Enrichment analysis of the main pathways. The X-axes represented the category of each pathway. The Y-axes represented the number of genes in pathway analysis.
