# Supplementary material for: Comparative Transcriptome Profiling of Two Tomato Genotypes in Response to Potassium-Deficiency Stress
Source: MDPI journal article supplement (doi:10.3390/ijms19082402), 2018-08-14
Supplement: s1 [file s1]

**Table S2:** DEGs related to oxidative proteins in response to K<sup>+</sup>-deficiency stress.

| Group      | Gene ID            | log2(Fold change) |              |              |             | seq description |
|------------|--------------------|-------------------|--------------|--------------|-------------|-----------------|
|            |                    | JZ18              |              | JZ34         |             |                 |
|            |                    | 12h               | 24h          | 12h          | 24h         |                 |
| peroxidase | Solyc01g015080.2.1 | 1.127694108       |              |              |             | Peroxidase      |
|            | Solyc02g090450.2.1 | 1.073084029       |              |              |             | Peroxidase      |
|            | Solyc06g050440.2.1 | -1.094105721      |              |              |             | Peroxidase      |
|            | Solyc10g076190.1.1 | -1.18674262       |              |              |             | Peroxidase 1    |
|            | Solyc10g076210.1.1 | -1.25698262       |              |              |             | Peroxidase 1    |
|            | Solyc02g084780.2.1 | -1.323509333      |              |              |             | Peroxidase      |
|            | Solyc02g084800.2.1 | -1.328929699      |              |              |             | Peroxidase      |
|            | Solyc02g084790.2.1 | -1.368297493      |              |              |             | Peroxidase      |
|            | Solyc07g056480.2.1 | -1.63917944       |              |              |             | Peroxidase      |
|            | Solyc04g054500.2.1 | -1.639433702      |              |              |             | Peroxidase      |
|            | Solyc01g101050.2.1 |                   | 1.471219355  |              |             | Peroxidase 1    |
|            | Solyc03g025380.2.1 |                   | 1.270569789  |              |             | Peroxidase      |
|            | Solyc12g005790.1.1 |                   | 1.199173712  |              |             | Peroxidase 27   |
|            | Solyc11g018800.1.1 |                   | 1.192939395  |              |             | Peroxidase 2    |
|            | Solyc11g012690.1.1 |                   | 1.141147717  |              |             | Peroxidase      |
|            | Solyc11g010120.1.1 |                   | -1.068593205 |              |             | Peroxidase 17   |
|            | Solyc01g105770.2.1 |                   | -1.089735273 |              | 1.111556848 | Peroxidase      |
|            | Solyc04g081860.2.1 |                   | -1.288512683 |              |             | Peroxidase      |
|            | Solyc11g069070.1.1 |                   | -1.397682167 |              |             | Peroxidase      |
|            | Solyc07g049240.2.1 |                   | -1.422905743 |              |             | Peroxidase      |
|            | Solyc05g046030.2.1 |                   | -1.630585118 |              | 1.313263234 | Peroxidase      |
|            | Solyc01g067850.2.1 |                   |              | 2.934371332  |             | Peroxidase      |
|            | Solyc05g054250.1.1 |                   |              | 1.152239194  |             | Peroxidase      |
|            | Solyc01g067860.2.1 |                   |              | 1.101595196  | 1.057419063 | Peroxidase 24   |
|            | Solyc12g005790.1.1 |                   |              | -1.004196657 |             | Peroxidase      |
|            | Solyc04g015030.2.1 |                   |              | -1.648348065 |             | Peroxidase      |
|            | Solyc12g096530.1.1 |                   |              | -1.791111843 |             | Peroxidase      |
|            | Solyc05g010330.2.1 |                   |              |              | 4.392317423 | Peroxidase      |
|            | Solyc10g084240.1.1 |                   |              |              | 1.438213822 | Peroxidase      |
|            | Solyc01g067850.2.1 |                   |              |              | 2.584962501 | Peroxidase      |
|            | Solyc04g071890.2.1 |                   |              |              | 2.06523595  | Peroxidase 4    |
|            | Solyc04g081860.2.1 |                   |              |              | 1.472241675 | Peroxidase      |
|            | Solyc05g046020.2.1 |                   |              |              | 1.348931522 | Peroxidase      |
|            | Solyc03g006700.2.1 |                   |              |              | 1.346069494 | Peroxidase      |
|            | Solyc08g013930.2.1 |                   |              |              | 1.342017247 | Peroxidase      |
|            | Solyc02g092580.2.1 |                   |              |              | 1.30462536  | Peroxidase      |
|            | Solyc05g050880.2.1 |                   |              |              | 1.252496046 | Peroxidase      |
|            | Solyc05g046010.2.1 |                   |              |              | 1.140662496 | Peroxidase      |
|            | Solyc07g017880.2.1 |                   |              |              | 1.133880935 | Peroxidase      |

|                 |                    |              |              |              |                 |                 |
|-----------------|--------------------|--------------|--------------|--------------|-----------------|-----------------|
| Cytochrome P450 | Solyc12g005370.1.1 |              |              | 1.133423897  | Peroxidase 27   |                 |
|                 | Solyc03g044100.2.1 |              |              | 1.068666021  | Peroxidase 5    |                 |
|                 | Solyc10g076210.1.1 |              |              | -1.059655666 | Peroxidase 1    |                 |
|                 | Solyc07g052370.2.1 | 1.217845632  |              | 6.135281758  | Cytochrome P450 |                 |
|                 | Solyc03g114940.2.1 | 1.183381282  | -2.633525466 |              | Cytochrome P450 |                 |
|                 | Solyc04g078290.2.1 | -1.232265837 |              | 1.418532337  | Cytochrome P450 |                 |
|                 | Solyc11g030730.1.1 | -1.42752013  | 1.364363361  |              | Cytochrome P450 |                 |
|                 | Solyc04g078340.2.1 | -1.504512668 |              |              | Cytochrome P450 |                 |
|                 | Solyc10g007890.2.1 | -1.637515507 |              |              | Cytochrome P450 |                 |
|                 | Solyc03g122350.2.1 | -1.647956904 |              |              | Cytochrome P450 |                 |
|                 | Solyc03g111880.2.1 | -1.793477615 |              |              | Cytochrome P450 |                 |
|                 | Solyc07g041500.2.1 | -2.189421177 |              |              | Cytochrome P450 |                 |
|                 | Solyc07g006140.2.1 | -2.643513059 |              |              | Cytochrome P450 |                 |
|                 | Solyc06g074420.1.1 |              | 2.369534027  | 1.676844602  | Cytochrome P450 |                 |
|                 | Solyc04g079730.1.1 |              | 2.149299481  | 1.329920886  | Cytochrome P450 |                 |
|                 | Solyc03g111300.1.1 |              | 2.115477217  |              | Cytochrome P450 |                 |
|                 | Solyc02g094110.1.1 |              | 1.40730185   | 1.915839552  | Cytochrome P450 |                 |
|                 | Solyc02g080330.2.1 |              | -1.209141398 | -2.461522987 | -1.545717123    | Cytochrome P450 |
|                 | Solyc05g015350.2.1 |              | -1.298105219 |              |                 | Cytochrome P450 |
|                 | Solyc03g122360.2.1 |              | -1.392317423 |              |                 | Cytochrome P450 |
|                 | Solyc12g088970.1.1 |              |              | 2.274106664  |                 | Cytochrome P450 |
|                 | Solyc07g043460.2.1 |              |              | 1.285376368  |                 | Cytochrome P450 |
|                 | Solyc01g080900.2.1 |              |              | 1.091350462  |                 | Cytochrome P450 |
|                 | Solyc02g065190.2.1 |              |              | 1.029570322  |                 | Cytochrome P450 |
|                 | Solyc10g017510.2.1 |              |              | 1.063999516  |                 | Cytochrome P450 |
|                 | Solyc01g008650.2.1 |              |              | -1.142604395 |                 | Cytochrome P450 |
|                 | Solyc06g076160.2.1 |              |              | -1.154658245 | 4.943979914     | Cytochrome P450 |
|                 | Solyc10g083400.1.1 |              |              | -1.291956015 |                 | Cytochrome P450 |
|                 | Solyc08g081220.1.1 |              |              | -1.401721298 |                 | Cytochrome P450 |
|                 | Solyc04g083140.1.1 |              |              | -1.477321778 |                 | Cytochrome P450 |
|                 | Solyc09g059240.2.1 |              |              | -1.498805857 |                 | Cytochrome P450 |
|                 | Solyc03g112030.1.1 |              |              | -1.543142325 | 2.446952679     | Cytochrome P450 |
|                 | Solyc10g078230.1.1 |              |              | -1.987509056 |                 | Cytochrome P450 |
|                 | Solyc10g080870.2.1 |              |              | -2.095507331 | -2.222392421    | Cytochrome P450 |
|                 | Solyc10g081550.1.1 |              |              | -2.224966365 |                 | Cytochrome P450 |
|                 | Solyc04g071780.2.1 |              |              | -2.373458396 | 1.887525271     | Cytochrome P450 |
|                 | Solyc06g073570.2.1 |              |              | -2.620151929 |                 | Cytochrome P450 |
|                 | Solyc06g066230.2.1 |              |              |              | 6.185866545     | Cytochrome P450 |
|                 | Solyc05g047530.2.1 |              |              |              | 4.02128092      | Cytochrome P450 |
|                 | Solyc04g083140.1.1 |              |              |              | 3.837484588     | Cytochrome P450 |
|                 | Solyc01g109140.2.1 |              |              |              | 1.73875564      | Cytochrome P450 |
|                 | Solyc02g090350.2.1 |              |              |              | 1.73104076      | Cytochrome P450 |
|                 | Solyc05g021390.2.1 |              |              |              | 1.607122567     | Cytochrome P450 |

|                              |                    |              |              |                                        |
|------------------------------|--------------------|--------------|--------------|----------------------------------------|
|                              | Solyc06g082730.2.1 |              | 1.424922088  | Cytochrome P450                        |
|                              | Solyc03g112040.1.1 |              | 1.374395515  | Cytochrome P450                        |
|                              | Solyc06g076800.2.1 |              | 1.261086134  | Cytochrome P450                        |
|                              | Solyc04g071800.2.1 |              | 1.179835021  | Cytochrome P450                        |
| Glutathione<br>S-transferase | Solyc07g056440.2.1 | -1.066005681 |              | Glutathione S-transferase-like protein |
|                              | Solyc06g069040.2.1 | -1.309328058 |              | Glutathione S-transferase              |
|                              | Solyc07g056500.2.1 | -1.358781819 |              | Glutathione transferase                |
|                              | Solyc12g011300.1.1 | -1.482931534 |              | Glutathione transferase                |
|                              | Solyc07g056420.2.1 | -1.591337951 |              | Glutathione S-transferase-like protein |
|                              | Solyc10g084400.1.1 | -1.633084981 |              | Glutathione S-transferase              |
|                              | Solyc07g056480.2.1 | -1.63917944  |              | Glutathione S-transferase-like protein |
|                              | Solyc07g056470.2.1 | -1.782755945 | -1.018378529 | Glutathione S-transferase-like protein |
|                              | Solyc01g086680.2.1 | -1.795800695 |              | Glutathione S-transferase              |
|                              | Solyc09g011630.2.1 | -1.981746452 |              | Glutathione S-transferase-like protein |
|                              | Solyc09g011590.2.1 | -2.291763291 | -1.479196505 | Glutathione S-transferase-like protein |
|                              | Solyc09g011520.2.1 | -2.450679698 |              | Glutathione S-transferase-like protein |
|                              | Solyc06g009040.2.1 | -2.605426603 |              | Glutathione S-transferase              |
|                              | Solyc09g074850.2.1 | -2.776778074 | -1.503701886 | Glutathione S-transferase              |
|                              | Solyc09g011620.1.1 | -4.591089973 |              | Glutathione S-transferase-like protein |
|                              | Solyc06g075520.2.1 | 2.111446536  |              | Glutathione S-transferase              |
|                              | Solyc02g081340.2.1 | -1.346450414 |              | Glutathione S-transferase              |
|                              | Solyc07g056460.2.1 | -1.556049809 |              | Glutathione S-transferase-like protein |
|                              | Solyc09g011540.2.1 | -2.092649288 |              | Glutathione S-transferase-like protein |
|                              | Solyc07g056510.2.1 |              | 7.64385619   | Glutathione S-transferase              |
|                              | Solyc07g056430.2.1 |              | 7.087462841  | Glutathione S-transferase-like protein |
|                              | Solyc09g011550.2.1 |              | 3.03678667   | Glutathione S-transferase-like protein |
|                              | Solyc03g116120.1.1 |              | -3.010569242 | Glutathione S-transferase 12           |
